# Supplementary material
Source: publisher figshare collection journal article supplement (https://wiley.figshare.com/articles/dataset/_/3568797)
Supplement: Supplementary file 1 [file 1 › appendix-I.htm]

Ecological Archives M085-008-A9


*Ecological Archives* M085-008-A9

David M. Forsyth, Deborah J. Wilson, Tomás A. Easdale, Georges Kunstler, Charles D. Canham, Wendy A. Ruscoe, Elaine F. Wright, Lora Murphy, Andrew M. Gormley, Aurora Gaxiola, David A. Coomes. 2015. Century-scale effects of invasive deer and rodents on the dynamics of forests growing on soils of contrasting fertility. *Ecological Monographs* 85:156–179. http://dx.doi.org/10.1890/14-0389.1

Appendix I. Tables and figures summarizing the results of our field study investigating the effects of the presence and absence of deer on seedling growth and mortality rates in alluvial and marine terrace forests.

> View / download PDF.


---

[Back to M085-008]
