# Supplementary material
Source: publisher figshare collection journal article supplement (https://wiley.figshare.com/articles/dataset/_/3568797)
Supplement: Supplementary file 1 [file 1 › appendix-I.pdf]

**David M. Forsyth, Deborah J. Wilson, Tomás A. Easdale, Georges Kunstler, Charles D. Canham, Wendy A. Ruscoe, Elaine F. Wright, Lora Murphy, Andrew M. Gormley, Aurora Gaxiola, and David A. Coomes. 2014. Century-scale effects of invasive deer and rodents on the dynamics of forests growing on soils of contrasting fertility. *Ecological Monographs* VOL:pp–pp.**

APPENDIX I. Tables and figures summarizing the results of our field study investigating the effects of the presence and absence of deer on seedling growth and mortality rates in alluvial and marine terrace forests.

The figures and tables below show the seedling height growth and mortality rates observed in the presence (+) and absence (–) of deer in our field study. Figure I1 shows the annual seedling growth and mortality rates for the species growing in the alluvial terrace forest and Fig. I2 shows the annual seedling growth and mortality rates for the species growing in the marine terrace forest. The left panels of Figs. I1 and I2 are the seedling growth rates in the presence and absence of deer estimated using the modified Michaelis–Menten function (Eq. 3), and the right panels of Figs. I1 and I2 are the seedling mortality rates in the presence and absence of deer estimated using the negative exponential function (Eq. 4). Tables I1 and I2 are the parameter estimates for the alluvial terrace forest species' seedling growth and mortality functions shown in Fig. I1. Tables I3 and I4 are the parameter estimates for the marine terrace forest species' seedling growth and mortality functions shown in Fig. I2.

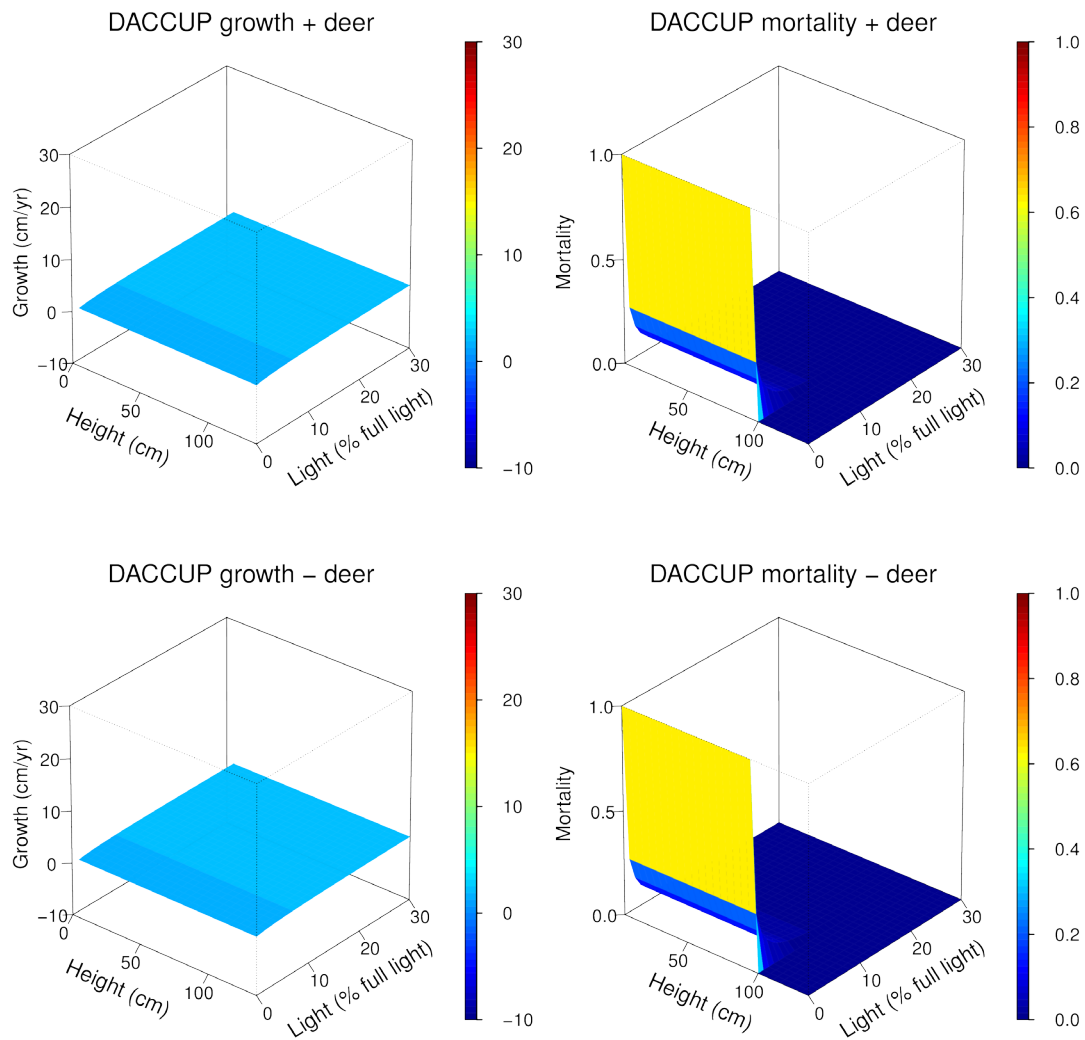

FIG. I1 (continued overleaf). Modeled annual seedling height growth and mortality rates for the 13 alluvial terrace forest tree species in the presence (+) and absence (-) of deer. For species acronyms see Table 1.

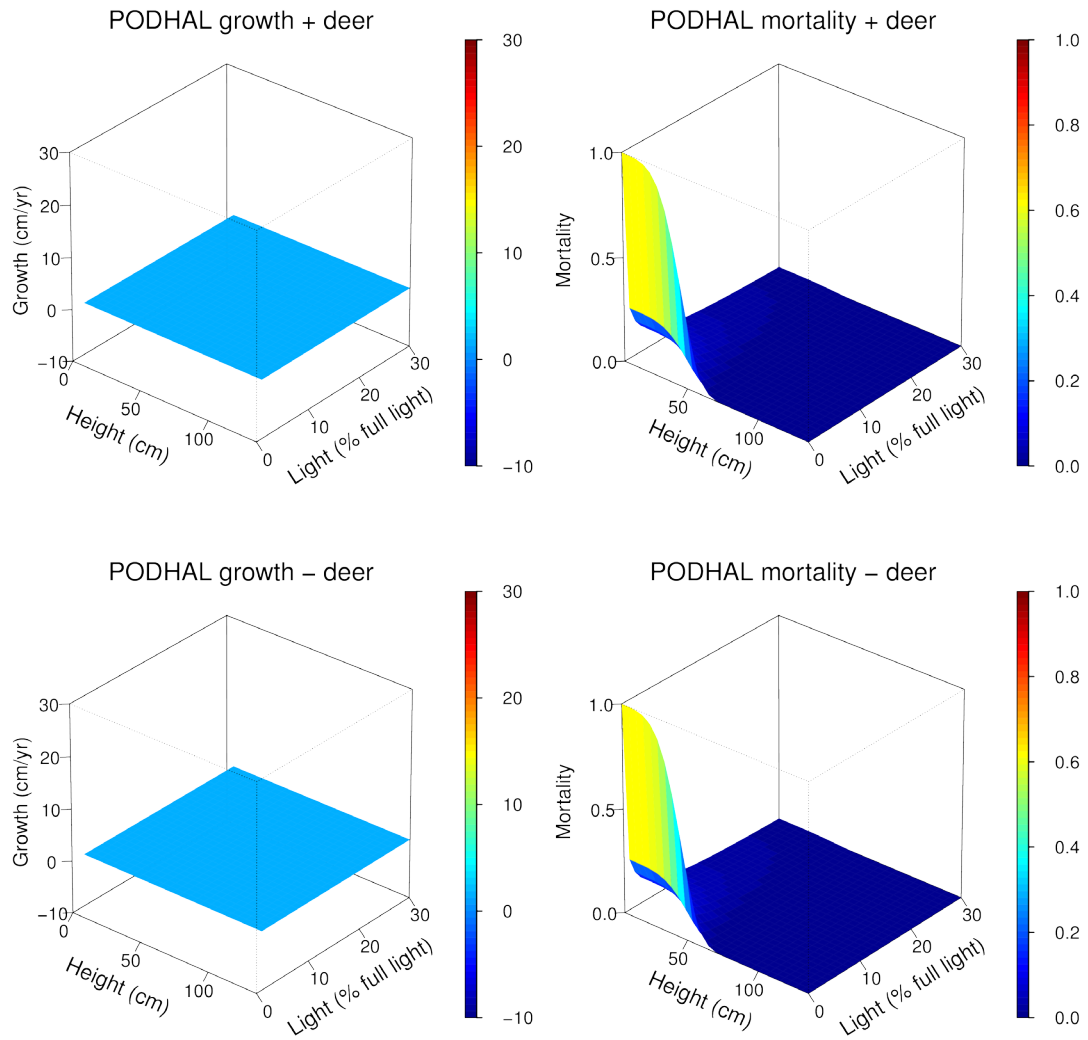

FIG. I1 (continued; continued overleaf). Modeled annual seedling height growth and mortality rates for the 13 alluvial terrace forest tree species in the presence (+) and absence (–) of deer. For species acronyms see Table 1.

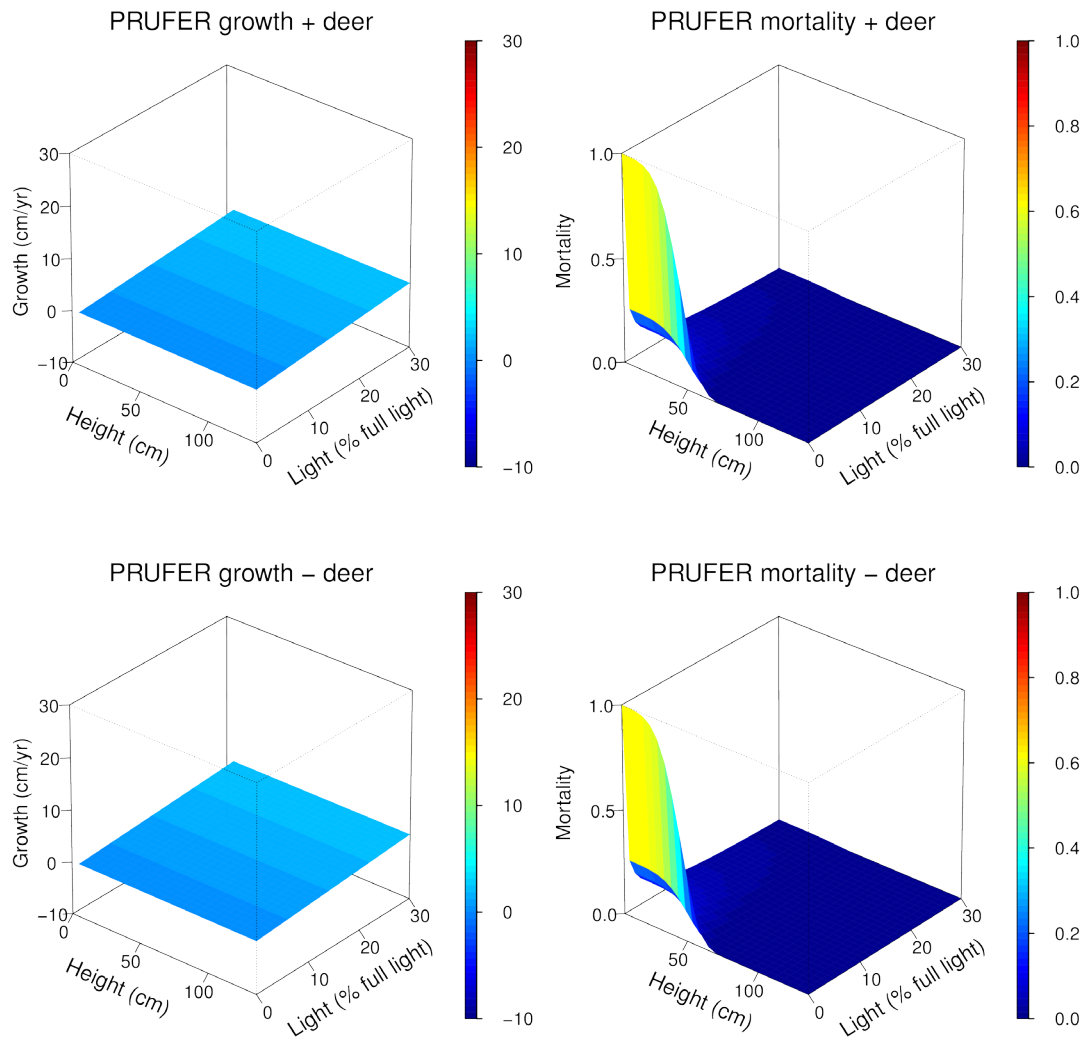

FIG. I1 (continued; continued overleaf). Modeled annual seedling height growth and mortality rates for the 13 alluvial terrace forest tree species in the presence (+) and absence (-) of deer. For species acronyms see Table 1.

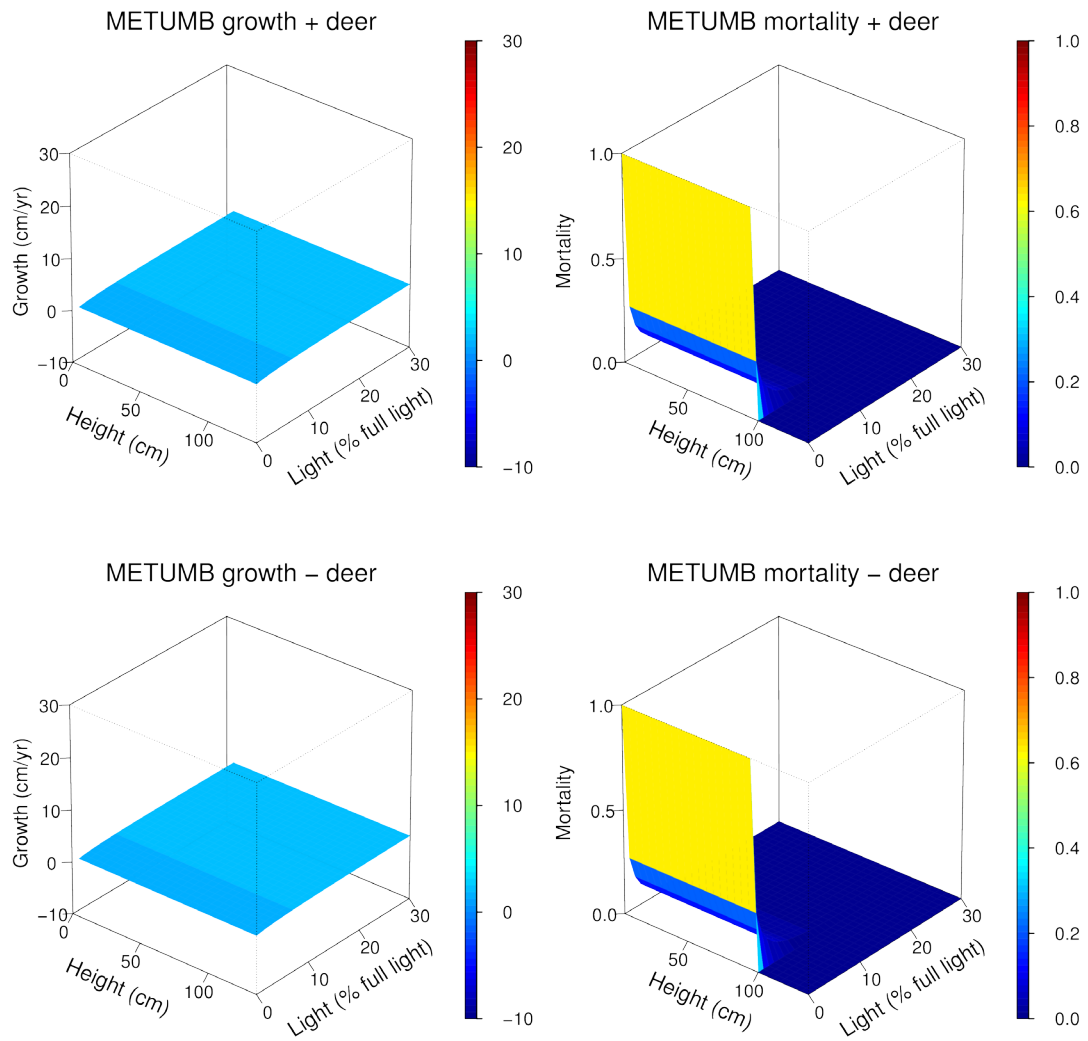

FIG. I1 (continued; continued overleaf). Modeled annual seedling height growth and mortality rates for the 13 alluvial terrace forest tree species in the presence (+) and absence (–) of deer. For species acronyms see Table 1.

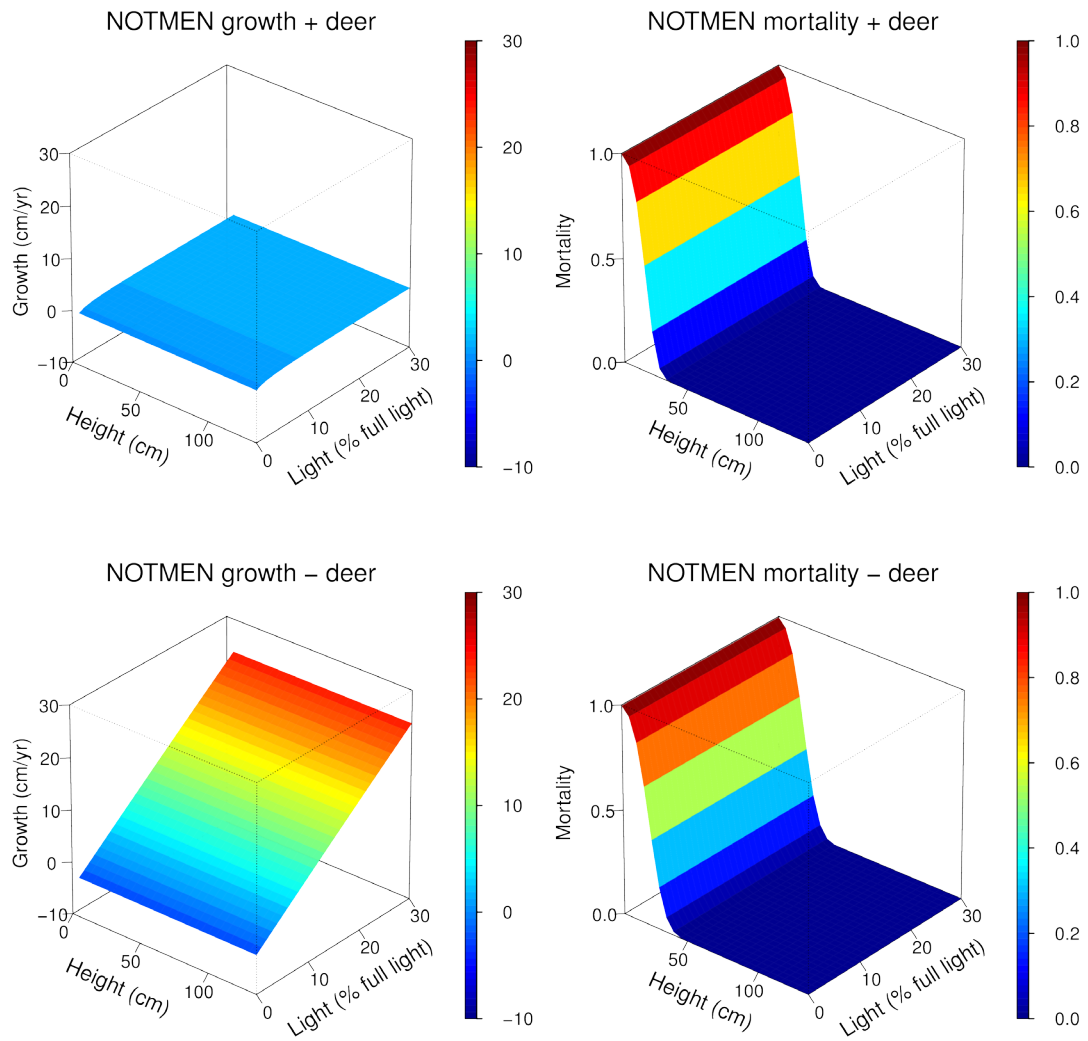

FIG. I1 (continued; continued overleaf). Modeled annual seedling height growth and mortality rates for the 13 alluvial terrace forest tree species in the presence (+) and absence (-) of deer. For species acronyms see Table 1.

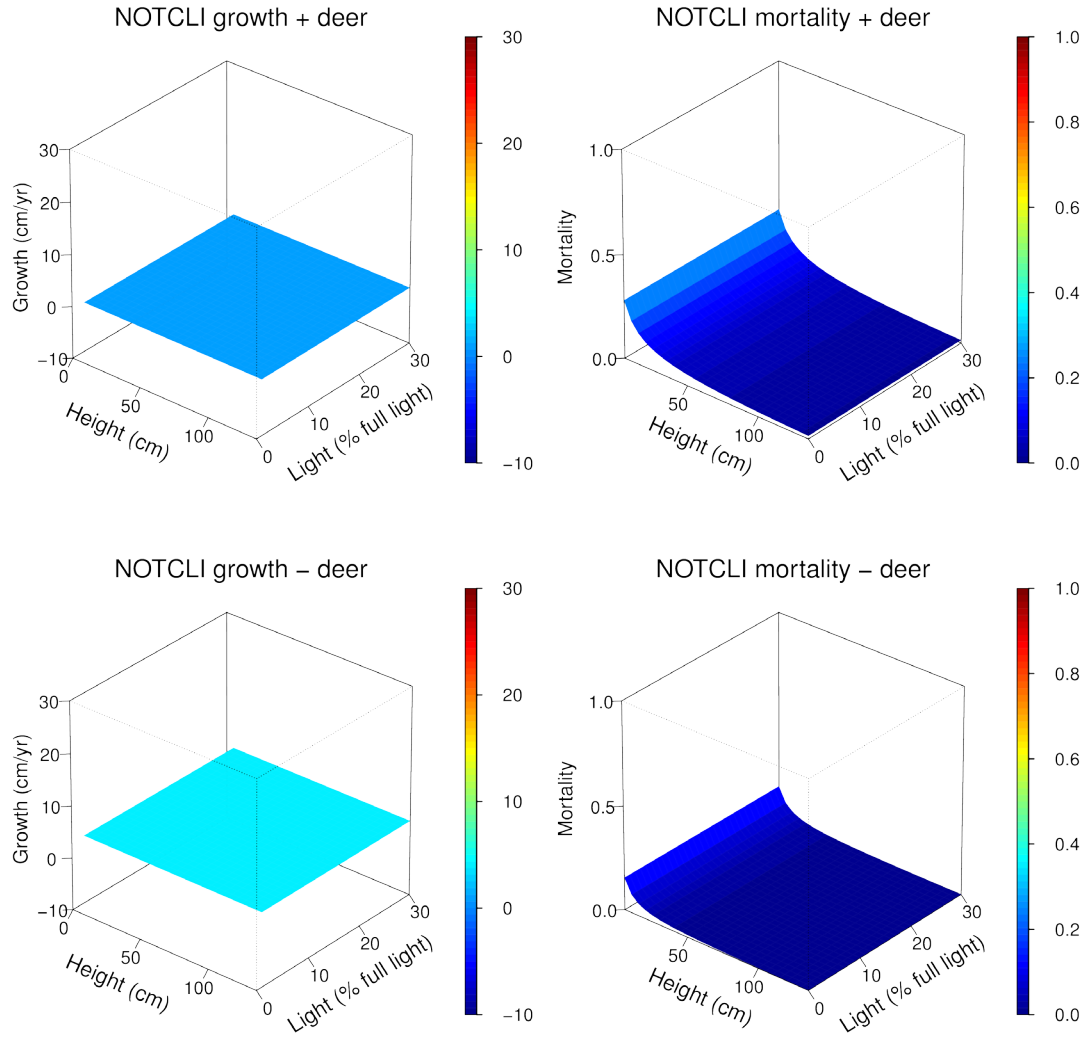

FIG. I1 (continued; continued overleaf). Modeled annual seedling height growth and mortality rates for the 13 alluvial terrace forest tree species in the presence (+) and absence (-) of deer. For species acronyms see Table 1.

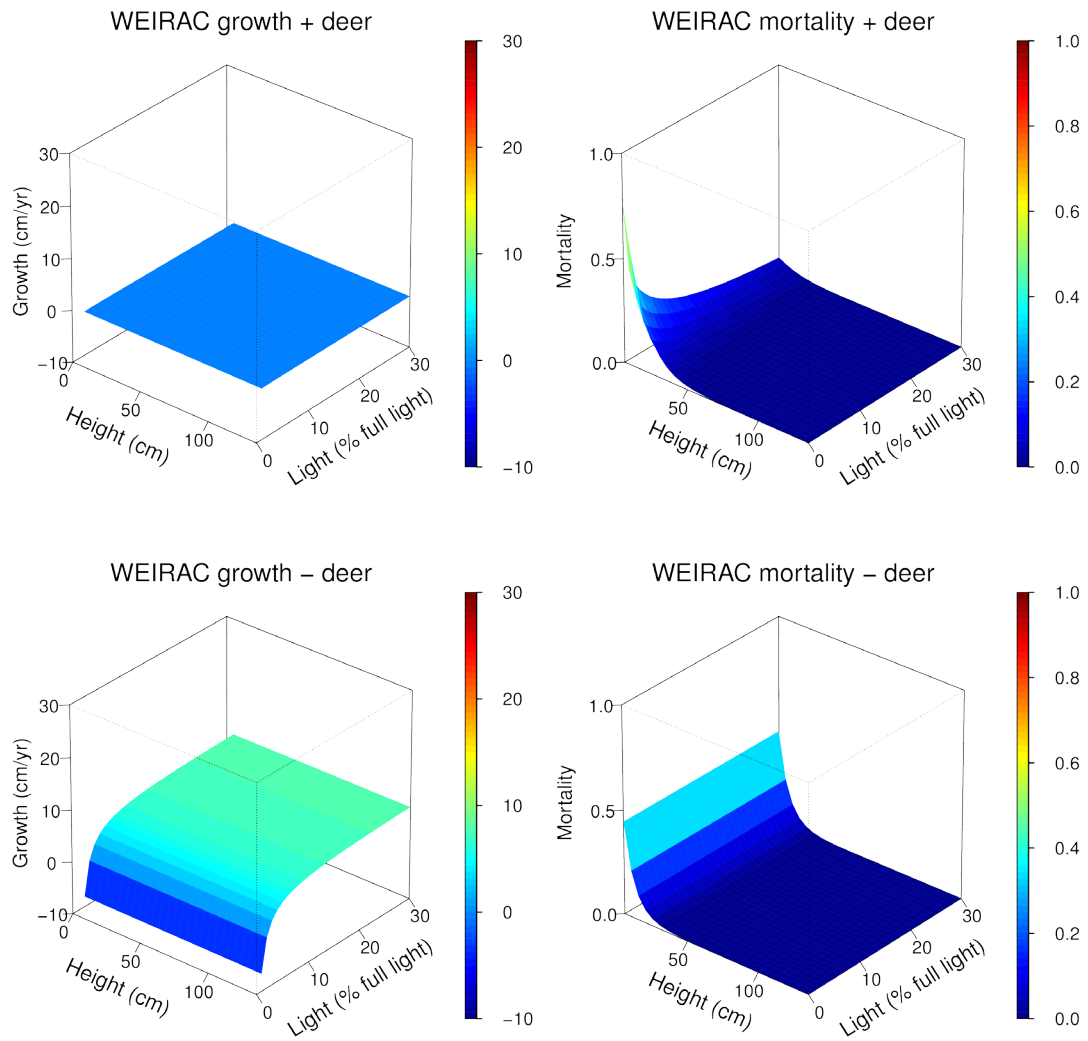

FIG. I1 (continued; continued overleaf). Modeled annual seedling height growth and mortality rates for the 13 alluvial terrace forest tree species in the presence (+) and absence (-) of deer. For species acronyms see Table 1.

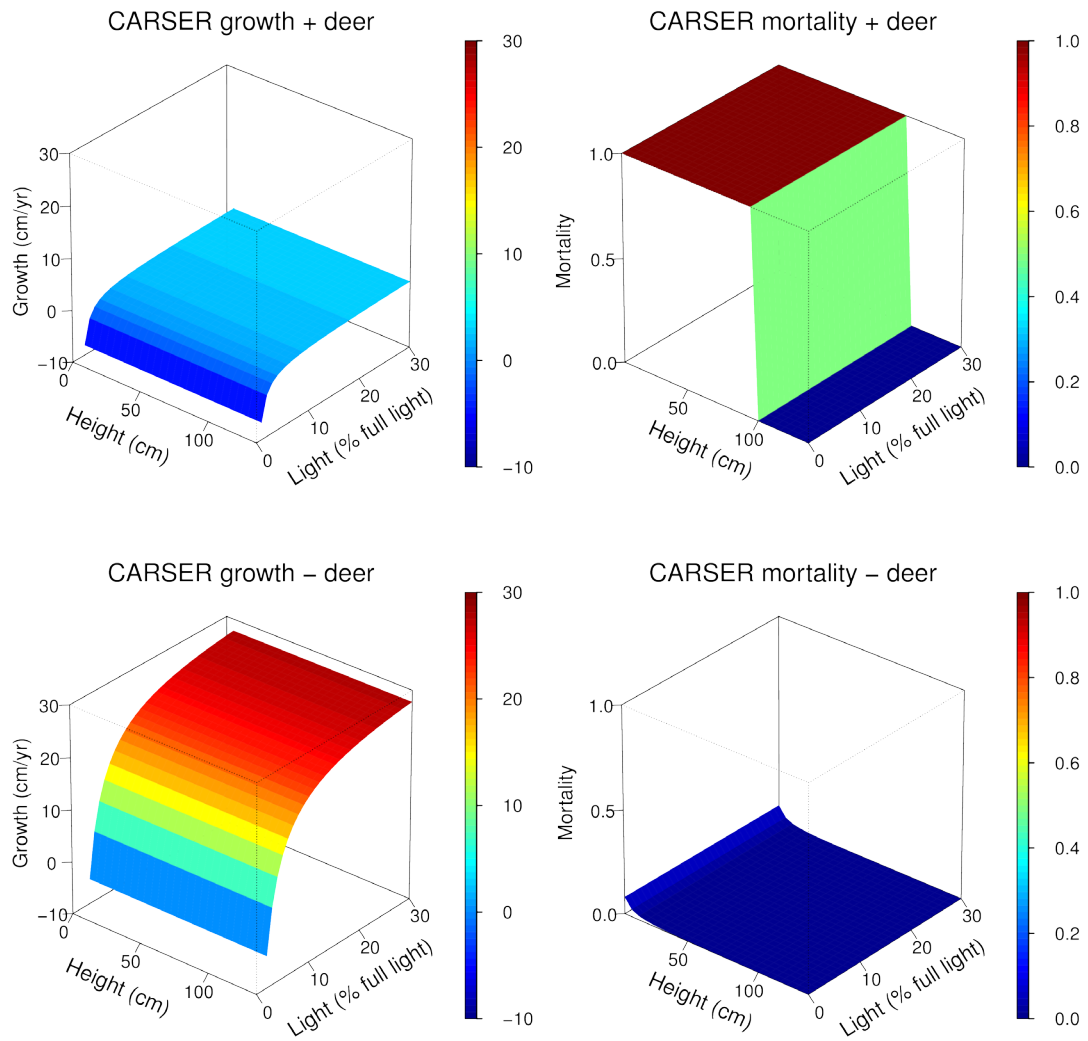

FIG. I1 (continued; continued overleaf). Modeled annual seedling height growth and mortality rates for the 13 alluvial terrace forest tree species in the presence (+) and absence (-) of deer. For species acronyms see Table 1.

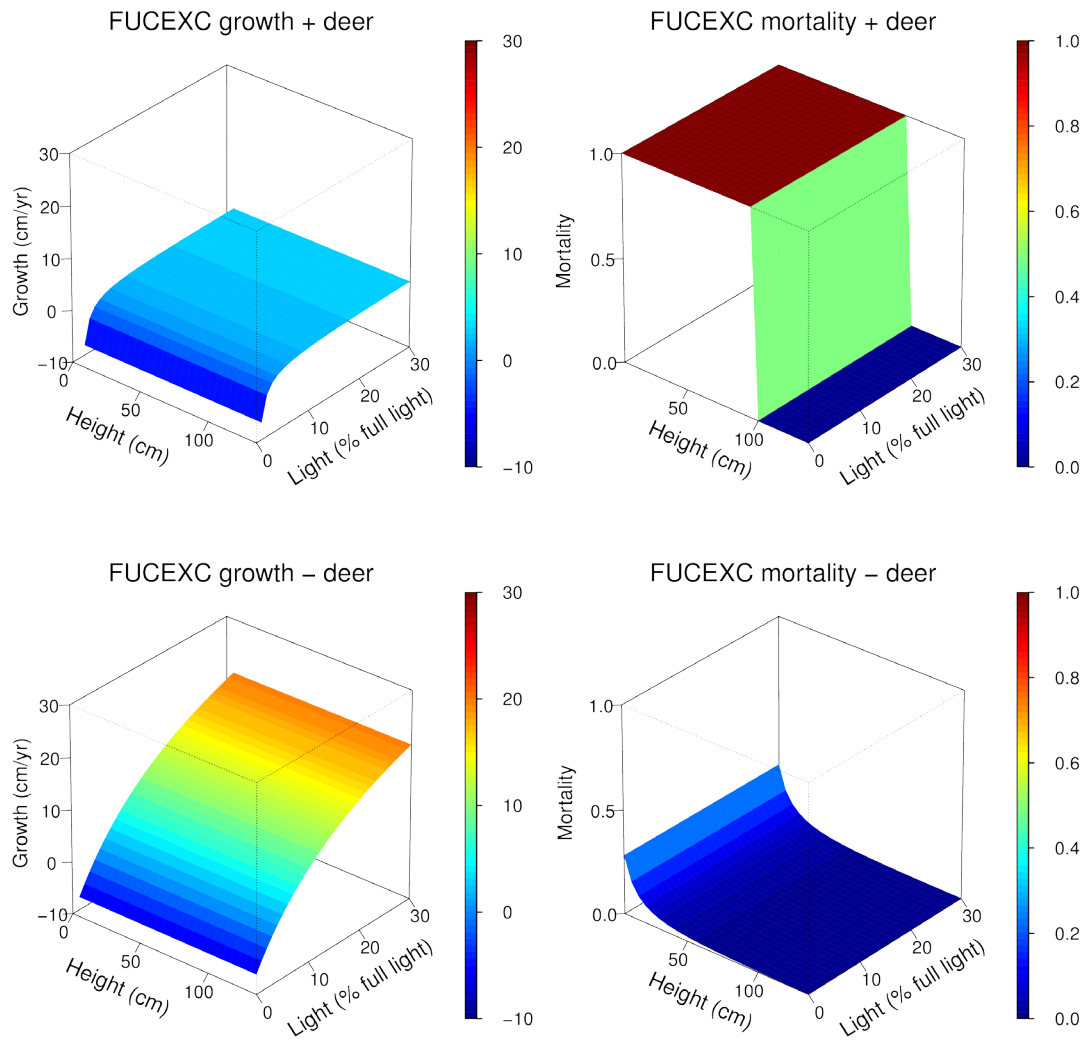

FIG. I1 (continued; continued overleaf). Modeled annual seedling height growth and mortality rates for the 13 alluvial terrace forest tree species in the presence (+) and absence (-) of deer. For species acronyms see Table 1.

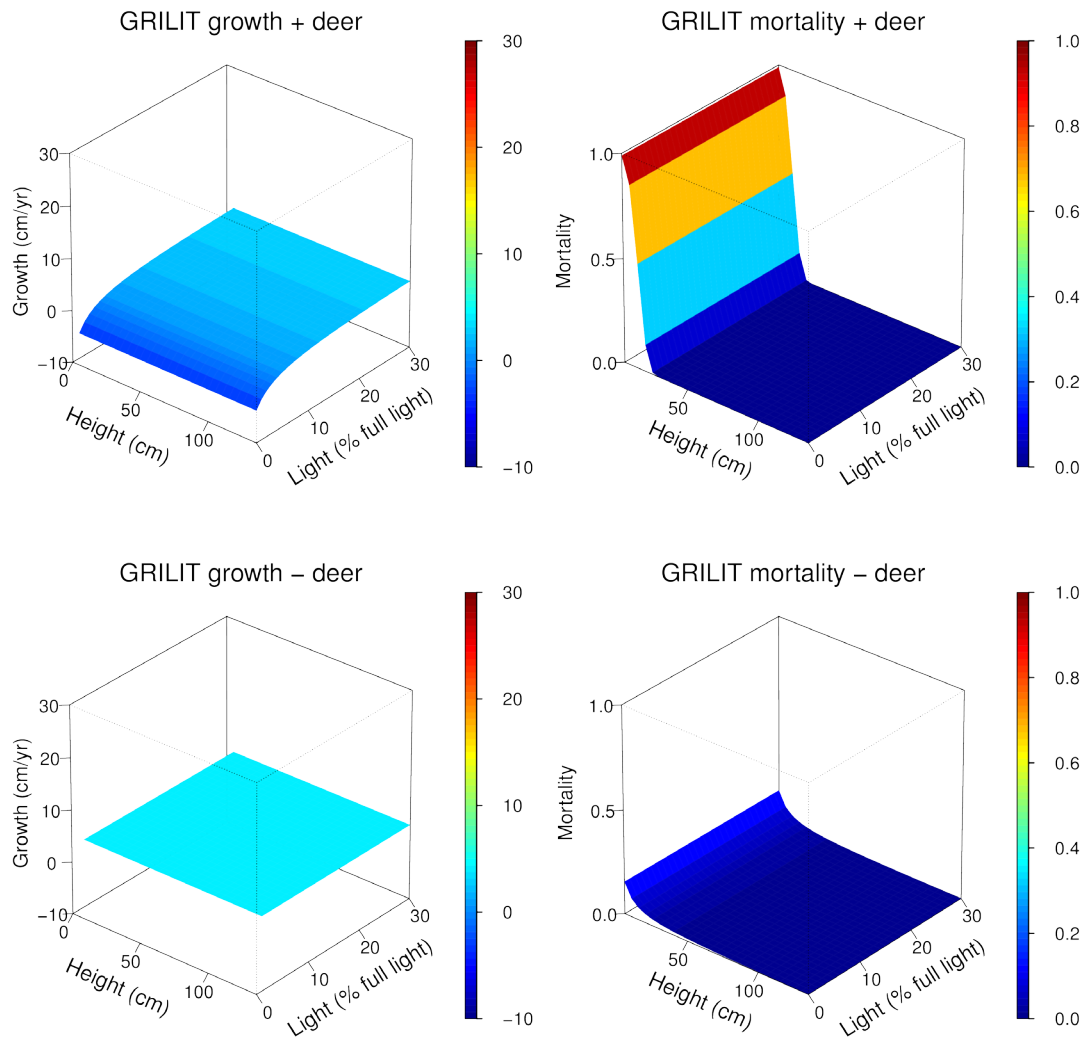

FIG. I1 (continued; continued overleaf). Modeled annual seedling height growth and mortality rates for the 13 alluvial terrace forest tree species in the presence (+) and absence (-) of deer. For species acronyms see Table 1.

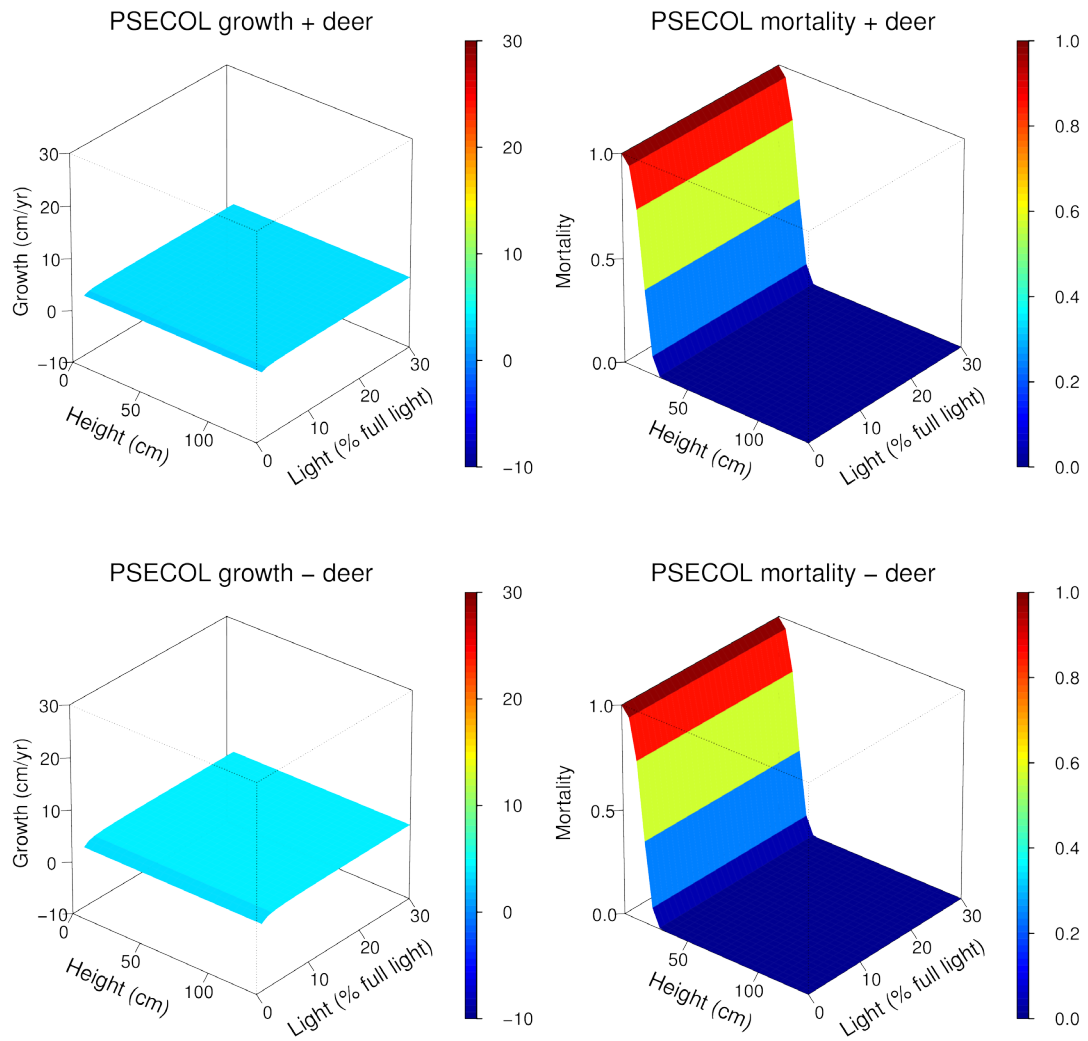

FIG. I1 (continued; continued overleaf). Modeled annual seedling height growth and mortality rates for the 13 alluvial terrace forest tree species in the presence (+) and absence (-) of deer. For species acronyms see Table 1.

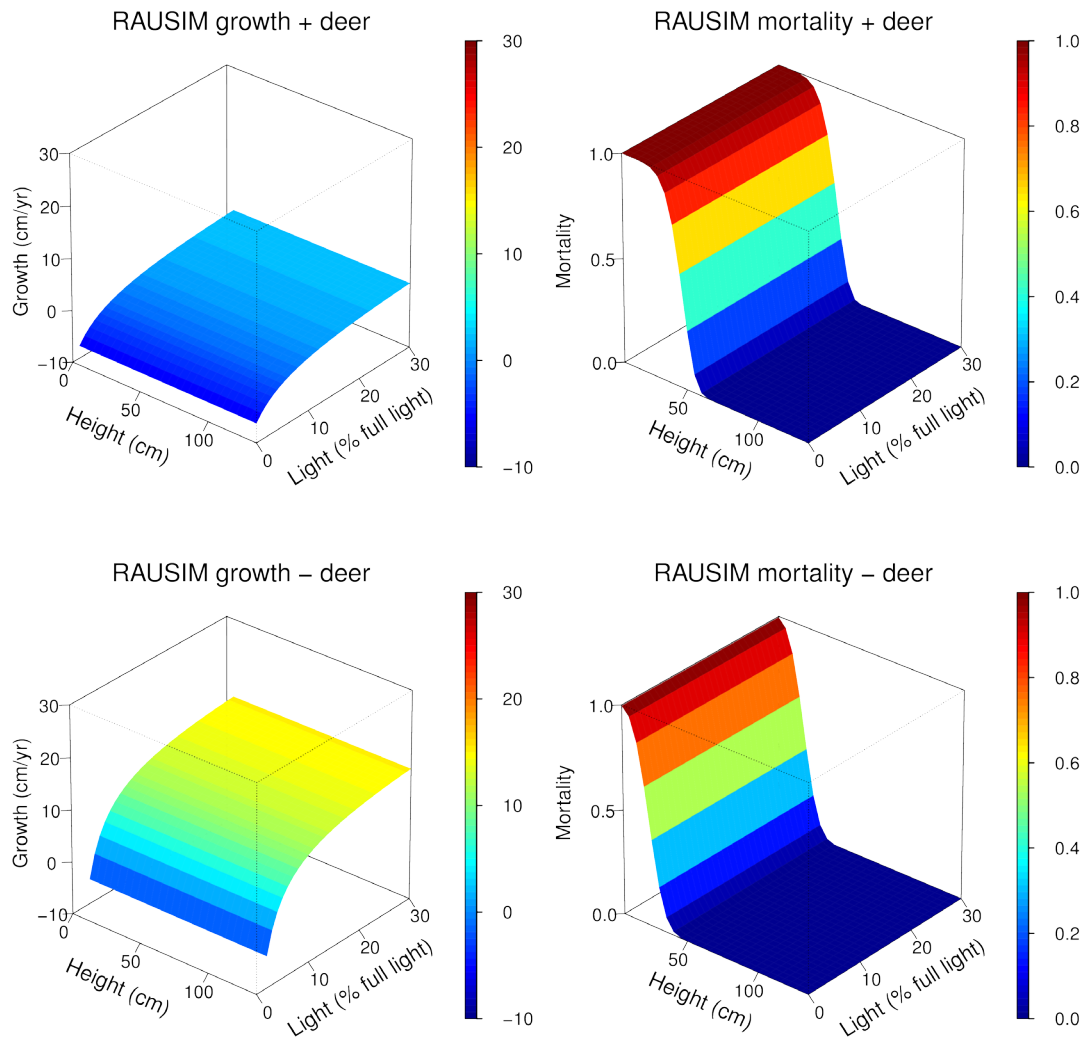

FIG. I1 (continued; continued overleaf). Modeled annual seedling height growth and mortality rates for the 13 alluvial terrace forest tree species in the presence (+) and absence (-) of deer. For species acronyms see Table 1.

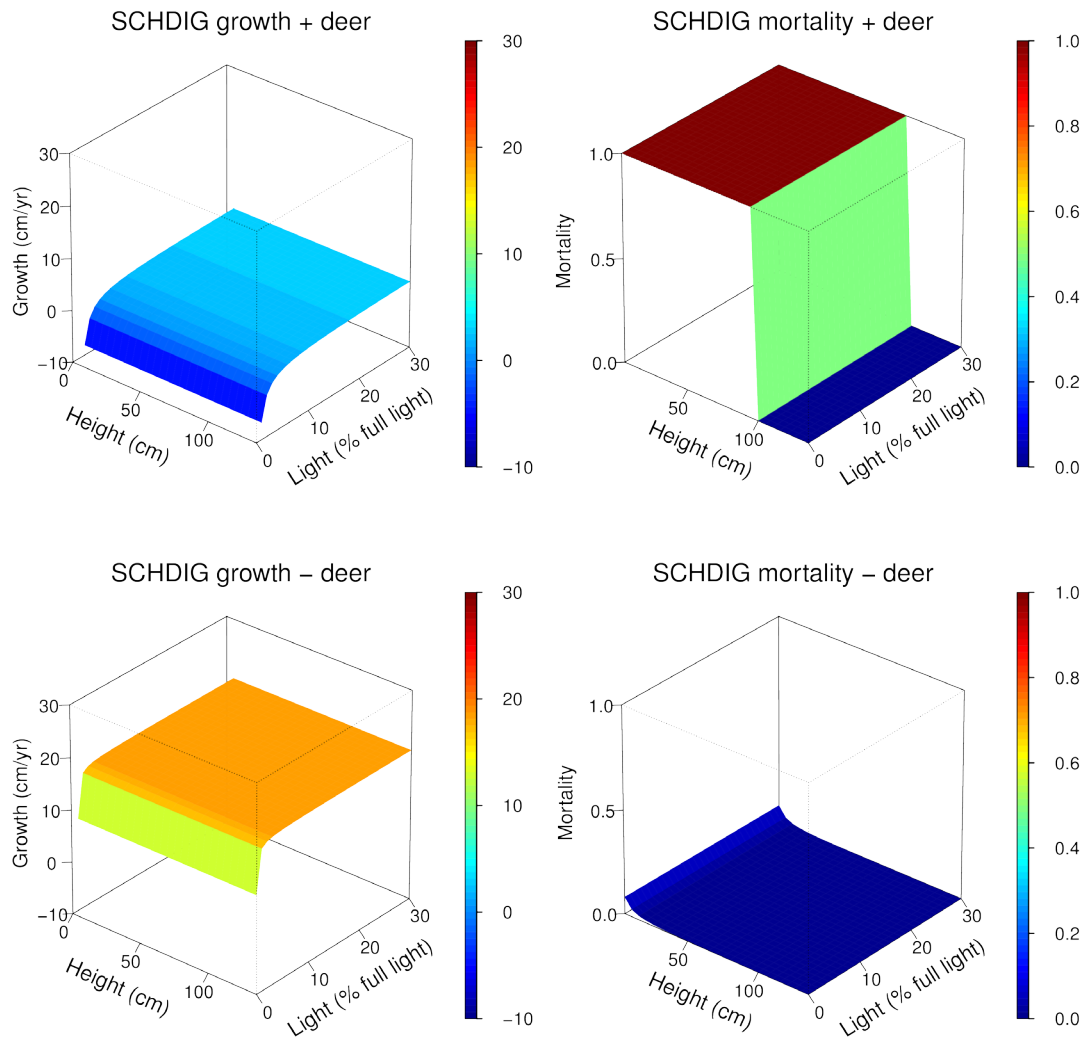

FIG. I1 (continued). Modeled annual seedling height growth and mortality rates for the 13 alluvial terrace forest tree species in the presence (+) and absence (-) of deer. For species acronyms see Table 1.

TABLE II. Parameter estimates from the modified Michaelis–Menten model of annual seedling height growth rates in the presence (+) and absence (–) of deer for the 13 alluvial terrace forest tree species. SD, standard deviation. For species acronyms see Table 1.

| Species                         | Deer | $\alpha$ | $\beta$  | $\gamma$ | SD     | $n$ | Surrogate     |
|---------------------------------|------|----------|----------|----------|--------|-----|---------------|
| <b>Conifers (canopy)</b>        |      |          |          |          |        |     |               |
| DACCUP                          | +    | 1.184    | 0.196    | –1.238   | 2.159  | 159 | -             |
| DACCUP                          | –    | 1.184    | 0.196    | –1.238   | 2.159  | -   | DACCUP + deer |
| PODHAL                          | +    | 0.000    | 1.000    | –1.280   | 1.955  | 5   | -             |
| PODHAL                          | –    | 0.000    | 1.000    | –1.280   | 1.955  | -   | PODHAL + deer |
| PRUFER                          | +    | 3758.870 | 0.076    | –0.207   | 2.286  | 508 | -             |
| PRUFER                          | –    | 3758.870 | 0.076    | –0.207   | 2.286  | -   | PRUFER + deer |
| <b>Angiosperms (canopy)</b>     |      |          |          |          |        |     |               |
| METUMB                          | +    | 1.184    | 0.196    | –1.238   | 2.159  | -   | DACCUP + deer |
| METUMB                          | –    | 1.184    | 0.196    | –1.238   | 2.159  | -   | DACCUP + deer |
| NOTMEN                          | +    | 1.532    | 0.659    | –0.075   | 3.133  | 638 | -             |
| NOTMEN                          | –    | 999.977  | 0.897    | 2.456    | 6.120  | 126 | -             |
| NOTCLI                          | +    | 0.000    | 1.000    | –0.786   | 1.710  | 7   | -             |
| NOTCLI                          | –    | 0.000    | 1129.143 | –4.319   | 4.420  | -   | GRILIT – deer |
| WEIRAC                          | +    | 16.241   | 2467.438 | 16.353   | 3.597  | 454 | -             |
| WEIRAC                          | –    | 54.940   | 144.682  | 46.507   | 5.780  | 109 | -             |
| <b>Angiosperms (sub-canopy)</b> |      |          |          |          |        |     |               |
| CARSER                          | +    | 88.716   | 709.213  | 85.596   | 2.013  | -   | FUCEXC + deer |
| CARSER                          | –    | 100.507  | 93.107   | 69.212   | 10.810 | 13  | -             |
| FUCEXC                          | +    | 88.716   | 709.213  | 85.596   | 2.013  | 19  | -             |
| FUCEXC                          | –    | 44.624   | 2.058    | 6.183    | 5.690  | 107 | -             |
| GRILIT                          | +    | 7.449    | 2.004    | 3.809    | 0.739  | 15  | -             |
| GRILIT                          | –    | 0.000    | 1129.143 | –4.319   | 4.42   | 128 | -             |
| PSECOL                          | +    | 24.578   | 797.036  | 20.961   | 3.560  | 159 | -             |
| PSECOL                          | –    | 14.449   | 119.198  | 10.042   | 2.42   | 150 | -             |
| RAUSIM                          | +    | 10.619   | 1.591    | 6.258    | 3.021  | 39  | -             |
| RAUSIM                          | –    | 43.372   | 21.493   | 25.533   | 5.290  | 17  | -             |
| SCHDIG                          | +    | 88.716   | 709.213  | 85.596   | 2.013  | -   | FUCEXC + deer |
| SCHDIG                          | –    | 9.797    | 49.312   | –8.922   | 14.229 | 145 | -             |

TABLE I2. Parameter estimates from the modified Michaelis–Menten model of annual seedling height growth rates in the presence (+) and absence (–) of deer for the seven marine terrace forest species. SD, standard deviation. For species acronyms see Table 1.

| Species                     | Deer | $\alpha$ | $\beta$ | $\gamma$ | SD    | $n$  |
|-----------------------------|------|----------|---------|----------|-------|------|
| <b>Conifers (canopy)</b>    |      |          |         |          |       |      |
|                             |      |          |         |          |       |      |
| DACCUP                      | +    | 2.559    | 0.261   | –0.834   | 1.759 | 1320 |
| DACCUP                      | –    | 0.000    | 309.440 | –2.135   | 1.840 | 98   |
| PODHAL                      | +    | 0.000    | 437.61  | –1.772   | 1.835 | 714  |
| PODHAL                      | –    | 0.000    | 12.796  | –0.721   | 1.263 | 55   |
| PRUFER                      | +    | 0.003    | 499.444 | –0.85    | 1.668 | 1595 |
| PRUFER                      | –    | 0.000    | 156.445 | –0.421   | 1.482 | 97   |
|                             |      |          |         |          |       |      |
| <b>Angiosperms (canopy)</b> |      |          |         |          |       |      |
|                             |      |          |         |          |       |      |
| METUMB                      | +    | 3.829    | 5.269   | 1.849    | 1.534 | 971  |
| METUMB                      | –    | 0.000    | 267.059 | –3.762   | 2.455 | 166  |
| NOTMEN                      | +    | 22.191   | 0.022   | –1.394   | 1.970 | 996  |
| NOTMEN                      | –    | 0.000    | 413.753 | –2.447   | 3.743 | 151  |
| NOTCLI                      | +    | 4.808    | 67.702  | 2.844    | 1.600 | 1596 |
| NOTCLI                      | –    | 12.947   | 14.583  | 9.583    | 1.131 | 46   |
| WEIRAC                      | +    | 0.005    | 46.93   | –0.748   | 1.888 | 778  |
| WEIRAC                      | –    | 28.606   | 0.024   | –4.192   | 5.394 | 169  |

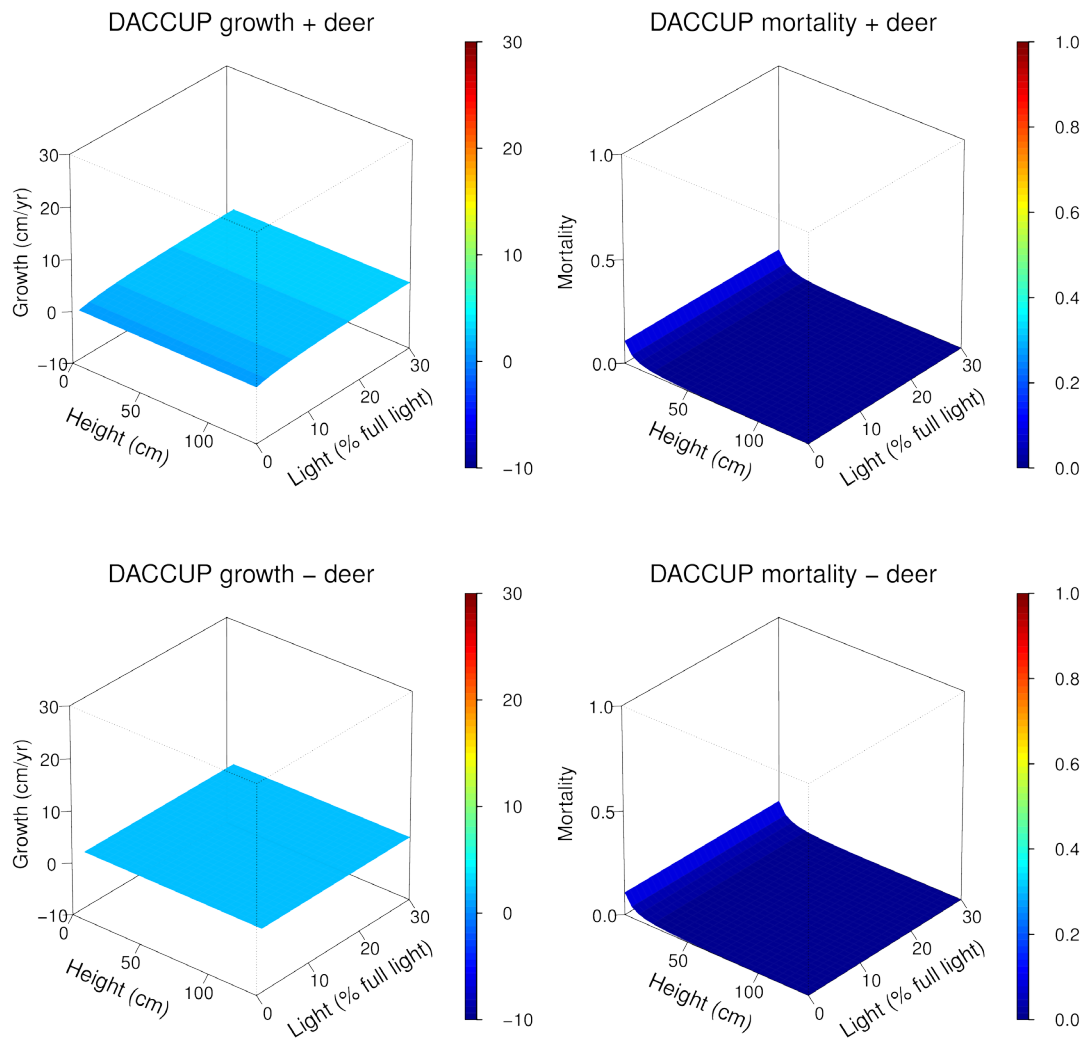

FIG. I2 (continued overleaf). Modeled annual seedling height growth and mortality rates for the seven marine terrace forest tree species in the presence (+) and absence (-) of deer. For species acronyms see Table 1.

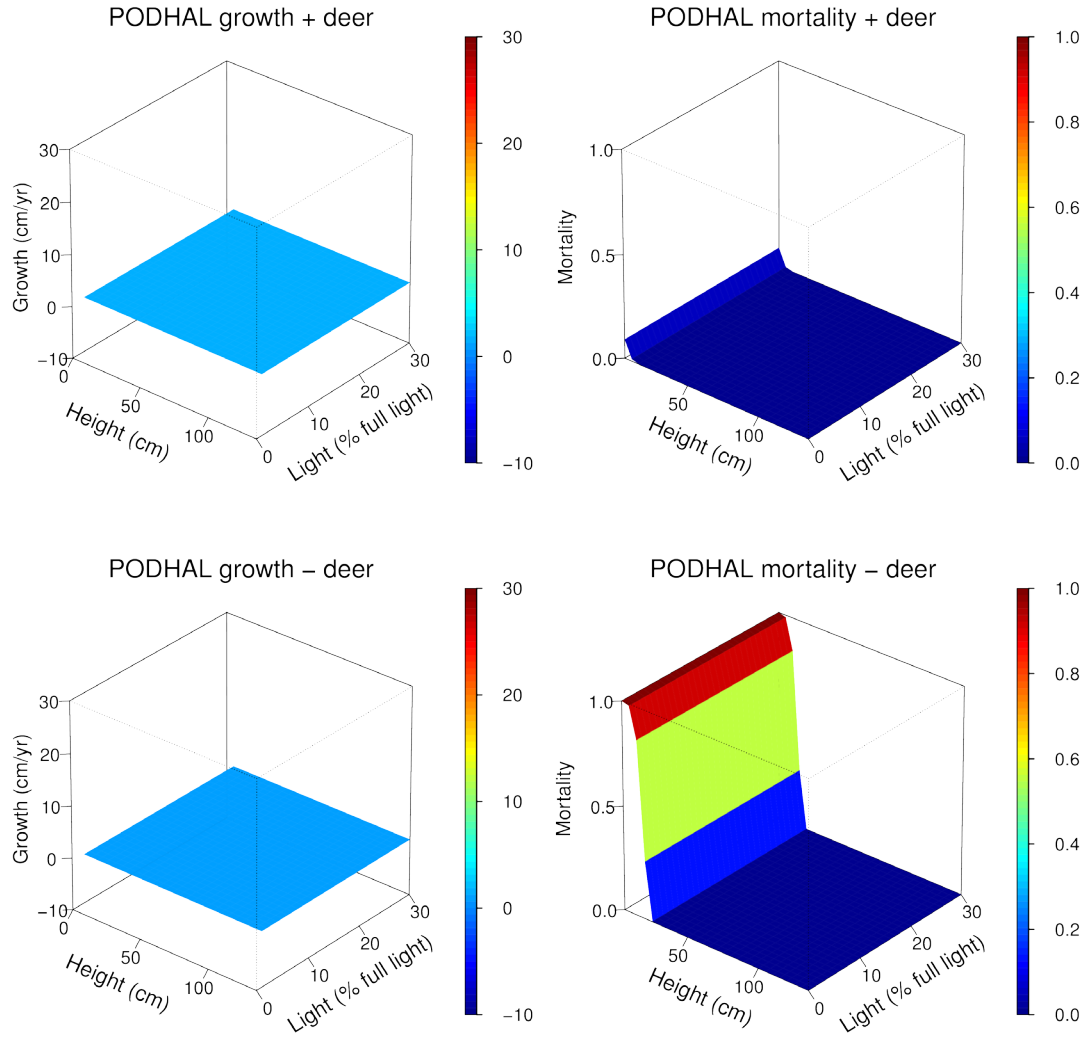

FIG. I2 (continued; continued overleaf). Modeled annual seedling height growth and mortality rates for the seven marine terrace forest tree species in the presence (+) and absence (-) of deer. For species acronyms see Table 1.

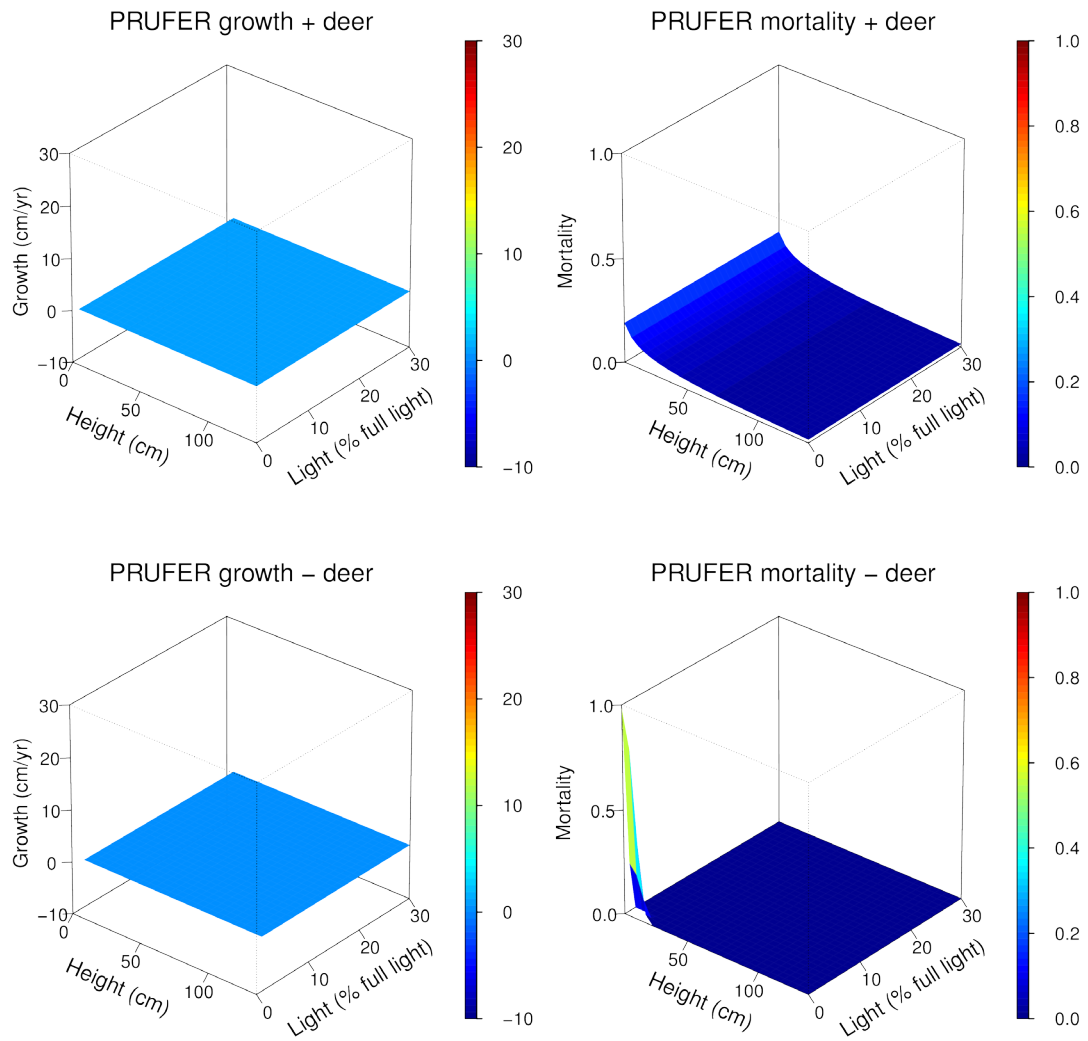

FIG. I2 (continued; continued overleaf). Modeled annual seedling height growth and mortality rates for the seven marine terrace forest tree species in the presence (+) and absence (-) of deer. For species acronyms see Table 1.

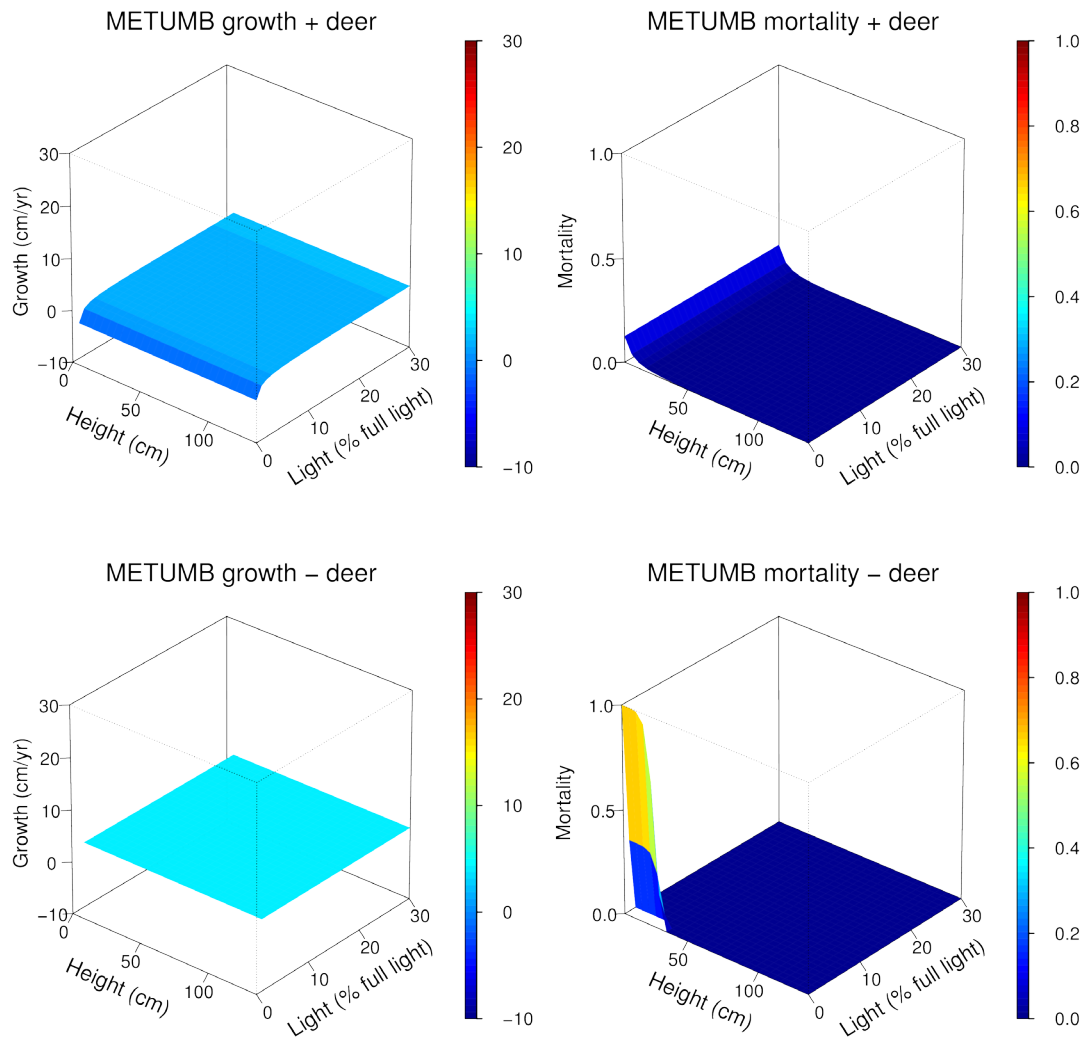

FIG. I2 (continued; continued overleaf). Modeled annual seedling height growth and mortality rates for the seven marine terrace forest tree species in the presence (+) and absence (-) of deer. For species acronyms see Table 1.

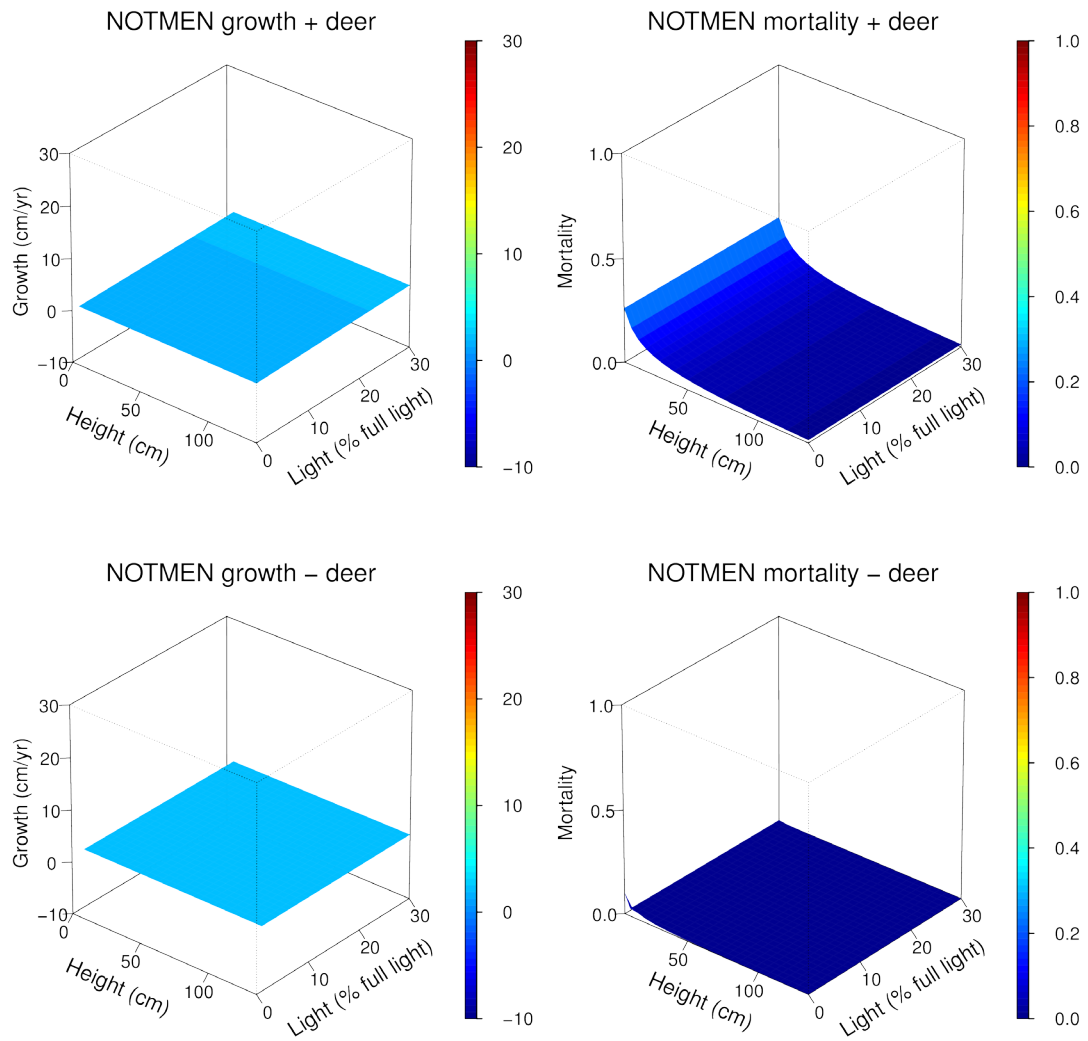

FIG. I2 (continued; continued overleaf). Modeled annual seedling height growth and mortality rates for the seven marine terrace forest tree species in the presence (+) and absence (-) of deer. For species acronyms see Table 1.

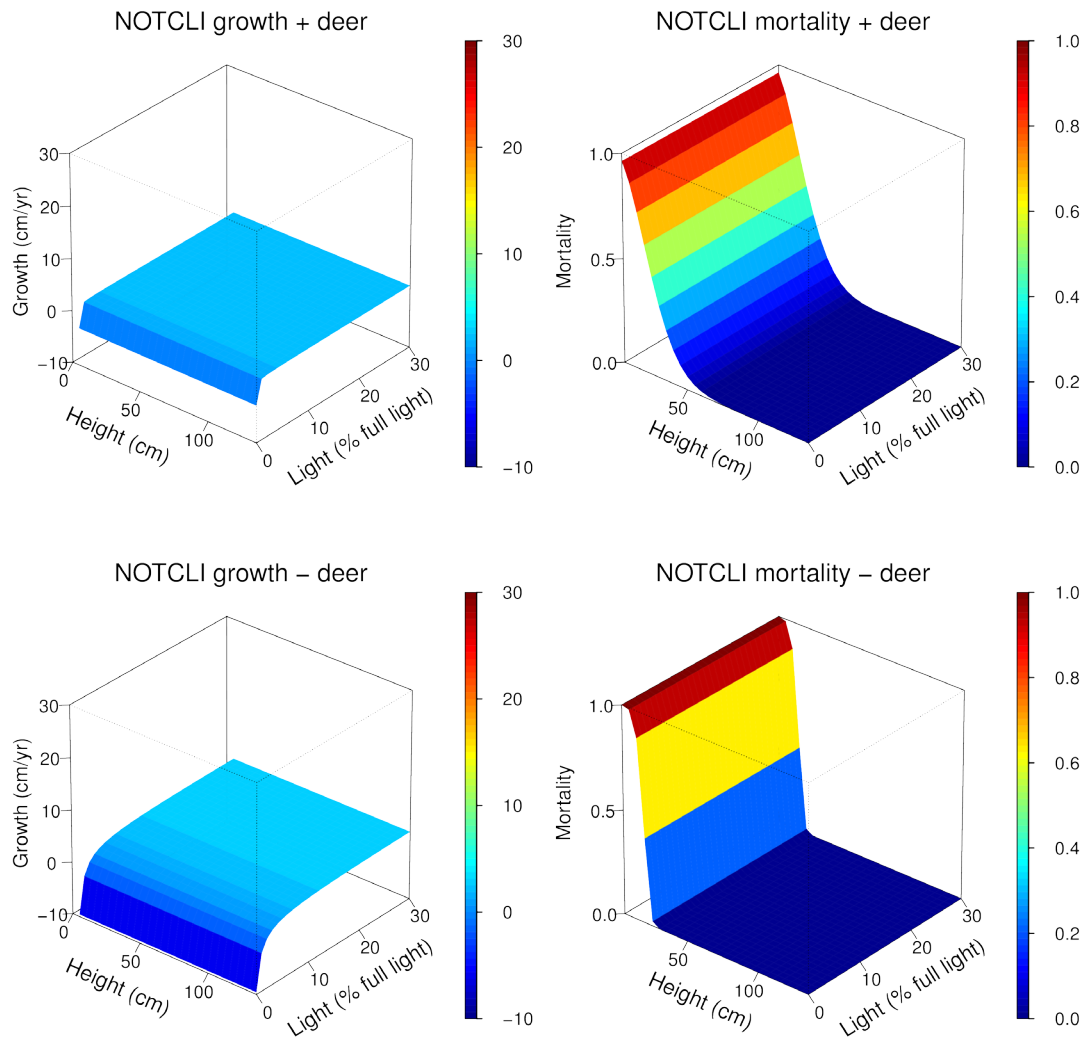

FIG. I2 (continued; continued overleaf). Modeled annual seedling height growth and mortality rates for the seven marine terrace forest tree species in the presence (+) and absence (-) of deer. For species acronyms see Table 1.

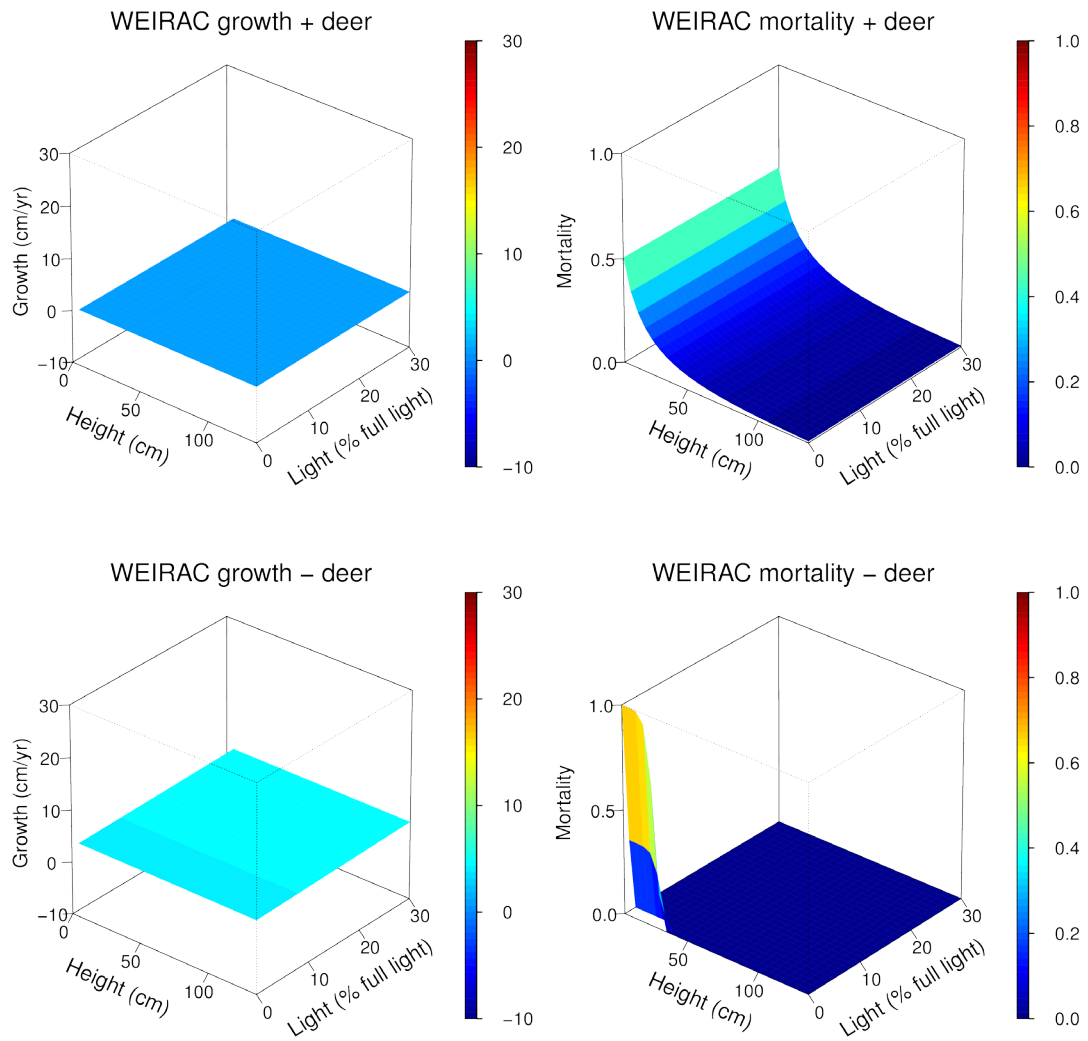

FIG. I2 (continued). Modeled annual seedling height growth and mortality rates for the seven marine terrace forest tree species in the presence (+) and absence (-) of deer. For species acronyms see Table 1.

TABLE I3. Parameter estimates from our model of annual seedling mortality in the presence (+) and absence (–) of deer for the 13 alluvial terrace forest tree species. For species acronyms see Table 1.

| Species                         | Deer | $M_{\max}$ | $a$     | $b$     | $c$   | $d$     | $n$  | Surrogate     |
|---------------------------------|------|------------|---------|---------|-------|---------|------|---------------|
| <b>Conifers (canopy)</b>        |      |            |         |         |       |         |      |               |
| DACCUP                          | +    | 1.000      | 793.859 | 981.930 | 1.366 | 0.467   | 172  | -             |
| DACCUP                          | –    | 1.000      | 793.859 | 981.930 | 1.366 | 0.467   | -    | DACCUP + deer |
| PODHAL                          | +    | 1.000      | 33.080  | 4.814   | 1.413 | 0.341   | -    | PRUFER + deer |
| PODHAL                          | –    | 1.000      | 33.080  | 4.814   | 1.413 | 0.341   | -    | PRUFER + deer |
| PRUFER                          | +    | 1.000      | 33.080  | 4.814   | 1.413 | 0.341   | 597  | -             |
| PRUFER                          | –    | 1.000      | 33.080  | 4.814   | 1.413 | 0.341   | -    | PRUFER + deer |
| <b>Angiosperms (canopy)</b>     |      |            |         |         |       |         |      |               |
| METUMB                          | +    | 1.000      | 793.859 | 981.930 | 1.366 | 0.467   | -    | DACCUP + deer |
| METUMB                          | –    | 1.000      | 793.859 | 981.930 | 1.366 | 0.467   | -    | DACCUP + deer |
| NOTMEN                          | +    | 0.303      | 306.221 | 3.800   | 0.000 | 20.265  | 1062 | -             |
| NOTMEN                          | –    | 0.150      | 83.487  | 3.282   | 0.000 | 40.149  | 130  |               |
| NOTCLI                          | +    | 0.999      | 3.798   | 0.366   | 0.000 | 0.002   | 225  | COPFOE + deer |
| NOTCLI                          | –    | 0.920      | 5.995   | 0.391   | 0.000 | 1.251   | -    | GRILIT – deer |
| WEIRAC                          | +    | 1.000      | 9.589   | 1.199   | 0.566 | 0.436   | 611  | -             |
| WEIRAC                          | –    | 0.982      | 11.831  | 0.896   | 0.000 | 49.316  | 109  | -             |
| <b>Angiosperms (sub-canopy)</b> |      |            |         |         |       |         |      |               |
| CARSER                          | +    | 0.390      | 997.159 | 350.451 | 0.000 | 75.031  | -    | FUCEXC + deer |
| CARSER                          | –    | 1.000      | 8.848   | 0.421   | 0.000 | 14.352  | -    | SCHDIG – deer |
| FUCEXC                          | +    | 0.390      | 997.159 | 350.451 | 0.000 | 75.031  | 49   | -             |
| FUCEXC                          | –    | 1.000      | 5.488   | 0.491   | 0.000 | 30.771  | 115  | -             |
| GRILIT                          | +    | 0.575      | 958.347 | 3.817   | 0.000 | 198.921 | 79   | -             |
| GRILIT                          | –    | 0.920      | 5.995   | 0.391   | 0.000 | 1.251   | 139  | -             |
| PSECOL                          | +    | 0.143      | 941.931 | 4.296   | 0.000 | 196.503 | 163  | -             |
| PSECOL                          | –    | 0.143      | 941.931 | 4.296   | 0.000 | 196.503 | 163  | PSECOL + deer |
| RAUSIM                          | +    | 0.169      | 146.488 | 6.855   | 0.000 | 190.075 | 62   | -             |
| RAUSIM                          | –    | 0.150      | 83.487  | 3.282   | 0.000 | 40.149  | -    | NOTMEN – deer |
| SCHDIG                          | +    | 0.390      | 997.159 | 350.451 | 0.000 | 75.031  | -    | FUCEXC + deer |
| SCHDIG                          | –    | 1.000      | 8.848   | 0.421   | 0.000 | 14.352  | 151  | -             |

TABLE I4. Parameter estimates from our model of annual seedling mortality rate in the presence (+) and absence (–) of deer for the seven marine terrace forest species. For species acronyms see Table 1.

| Species                     | Deer | $M_{\max}$ | $a$       | $b$   | $c$   | $d$    | $n$  | Surrogate     |
|-----------------------------|------|------------|-----------|-------|-------|--------|------|---------------|
| <b>Conifers (canopy)</b>    |      |            |           |       |       |        |      |               |
| DACCUP                      | +    | 1.000      | 7.432     | 0.403 | 0.000 | 49.606 | 1320 | -             |
| DACCUP <sup>†</sup>         | –    | 1.000      | 7.432     | 0.403 | 0.000 | 49.606 | -    | DACCUP + Deer |
| PODHAL                      | +    | 1.000      | 39.593    | 0.937 | 0.000 | 3.399  | 714  | -             |
| PODHAL                      | –    | 0.024      | 99958.980 | 6.997 | 0.000 | 48.673 | 57   | -             |
| PRUFER                      | +    | 1.000      | 3.823     | 0.279 | 0.000 | 3.688  | 1595 | -             |
| PRUFER                      | –    | 0.056      | 1629.857  | 3.867 | 1.455 | 45.099 | 101  | -             |
| <b>Angiosperms (canopy)</b> |      |            |           |       |       |        |      |               |
| METUMB                      | +    | 0.999      | 9.374     | 0.504 | 0.000 | 12.837 | 971  | -             |
| METUMB <sup>‡</sup>         | –    | 0.007      | 70774.262 | 8.775 | 1.073 | 44.129 | -    | WEIRAC – Deer |
| NOTMEN                      | +    | 1.000      | 3.883     | 0.355 | 0.000 | 6.266  | 996  | -             |
| NOTMEN                      | –    | 0.960      | 7.438     | 0.394 | 2.339 | 0.027  | 158  | -             |
| NOTCLI                      | +    | 0.333      | 10.217    | 1.878 | 0.000 | 5.056  | 1596 | -             |
| NOTCLI                      | –    | 0.064      | 31785.530 | 6.507 | 0.000 | 49.993 | 52   | -             |
| WEIRAC                      | +    | 0.454      | 4.078     | 0.597 | 0.000 | 17.349 | 778  | -             |
| WEIRAC                      | –    | 0.007      | 70774.262 | 8.775 | 1.073 | 44.129 | 171  | -             |

<sup>†</sup> Mortality rates were unreasonably high for this species in the absence of deer. We therefore used the mortality parameters for DACCUP in the presence of deer as a surrogate.

<sup>‡</sup> Mortality rates could not be estimated for METUMB in the absence of deer because no seedlings died. Based on Fig. B3 we used the mortality parameters for WEIRAC in the absence of deer as a surrogate.
